# Supplementary material for: Avian keratin disorder of Alaska black-capped chickadees is associated with Poecivirus infection
Source: Springer Nature journal article supplement (doi:10.1186/s12985-018-1008-5), 2018-06-14
Supplement: MOESM1 [file 15848966]

| Primer pair | Primer name | Sequence                            |
|-------------|-------------|-------------------------------------|
| 1           | Poeci_1F    | TGGCTGCTCTAGAGGATAAAGG              |
|             | Poeci_1R    | ACTGCACTACAACCAAATCTGT              |
| 2           | Poeci_2F    | AGCTTGGCCCCTCTAATTGT                |
|             | Poeci_2R    | GATTACTGTTCCGGTCTCTTGG              |
| 3           | Poeci_3F    | TGTCATACTTGCCACCTCCG                |
|             | Poeci_3R    | GCAACTTCCAATTGCACGTC                |
| 4           | Poeci_4F    | TGGGCATTGTCTCGAGTGTA                |
|             | Poeci_4R    | TACGAAAAGCCTCAGTCGGA                |
| 5           | Poeci_5F    | GACCGTGGATAATTATGTGAAAGGATTGAGACGT  |
|             | Poeci_5R    | GCGAACAGTGGTAGATACAGGCCGC           |
| 6           | Poeci_6F    | AAGCTCCATATGATCCAAATTATTCGCGGCG     |
|             | Poeci_6R    | AAGCAATATTATTCACCTCAATCAACTGTACCACA |
| 7           | Poeci_7F    | CAAAGTGTTGTAGAGGCCGGC               |
|             | Poeci_7R    | ACAACAAAATCCCGCAACGT                |
| 8           | avi_8F      | CAAGCTGCACCAAGGGAAAT                |
|             | avi_8r      | TCACAGAATCACTAGGTTGGAAG             |

Additional file 1: primers. Poeci\_2F targeting the 5' UTR is not represented in the Sanger sequencing validated Poecivirus genome deposited in GenBank (accession number KU977108).
